# Supplementary material
Source: publisher figshare collection journal article supplement (https://gsajournals.figshare.com/articles/dataset/_/7934615)

Figure S1. Pierce/PI 41353 Graphical Genetic Map

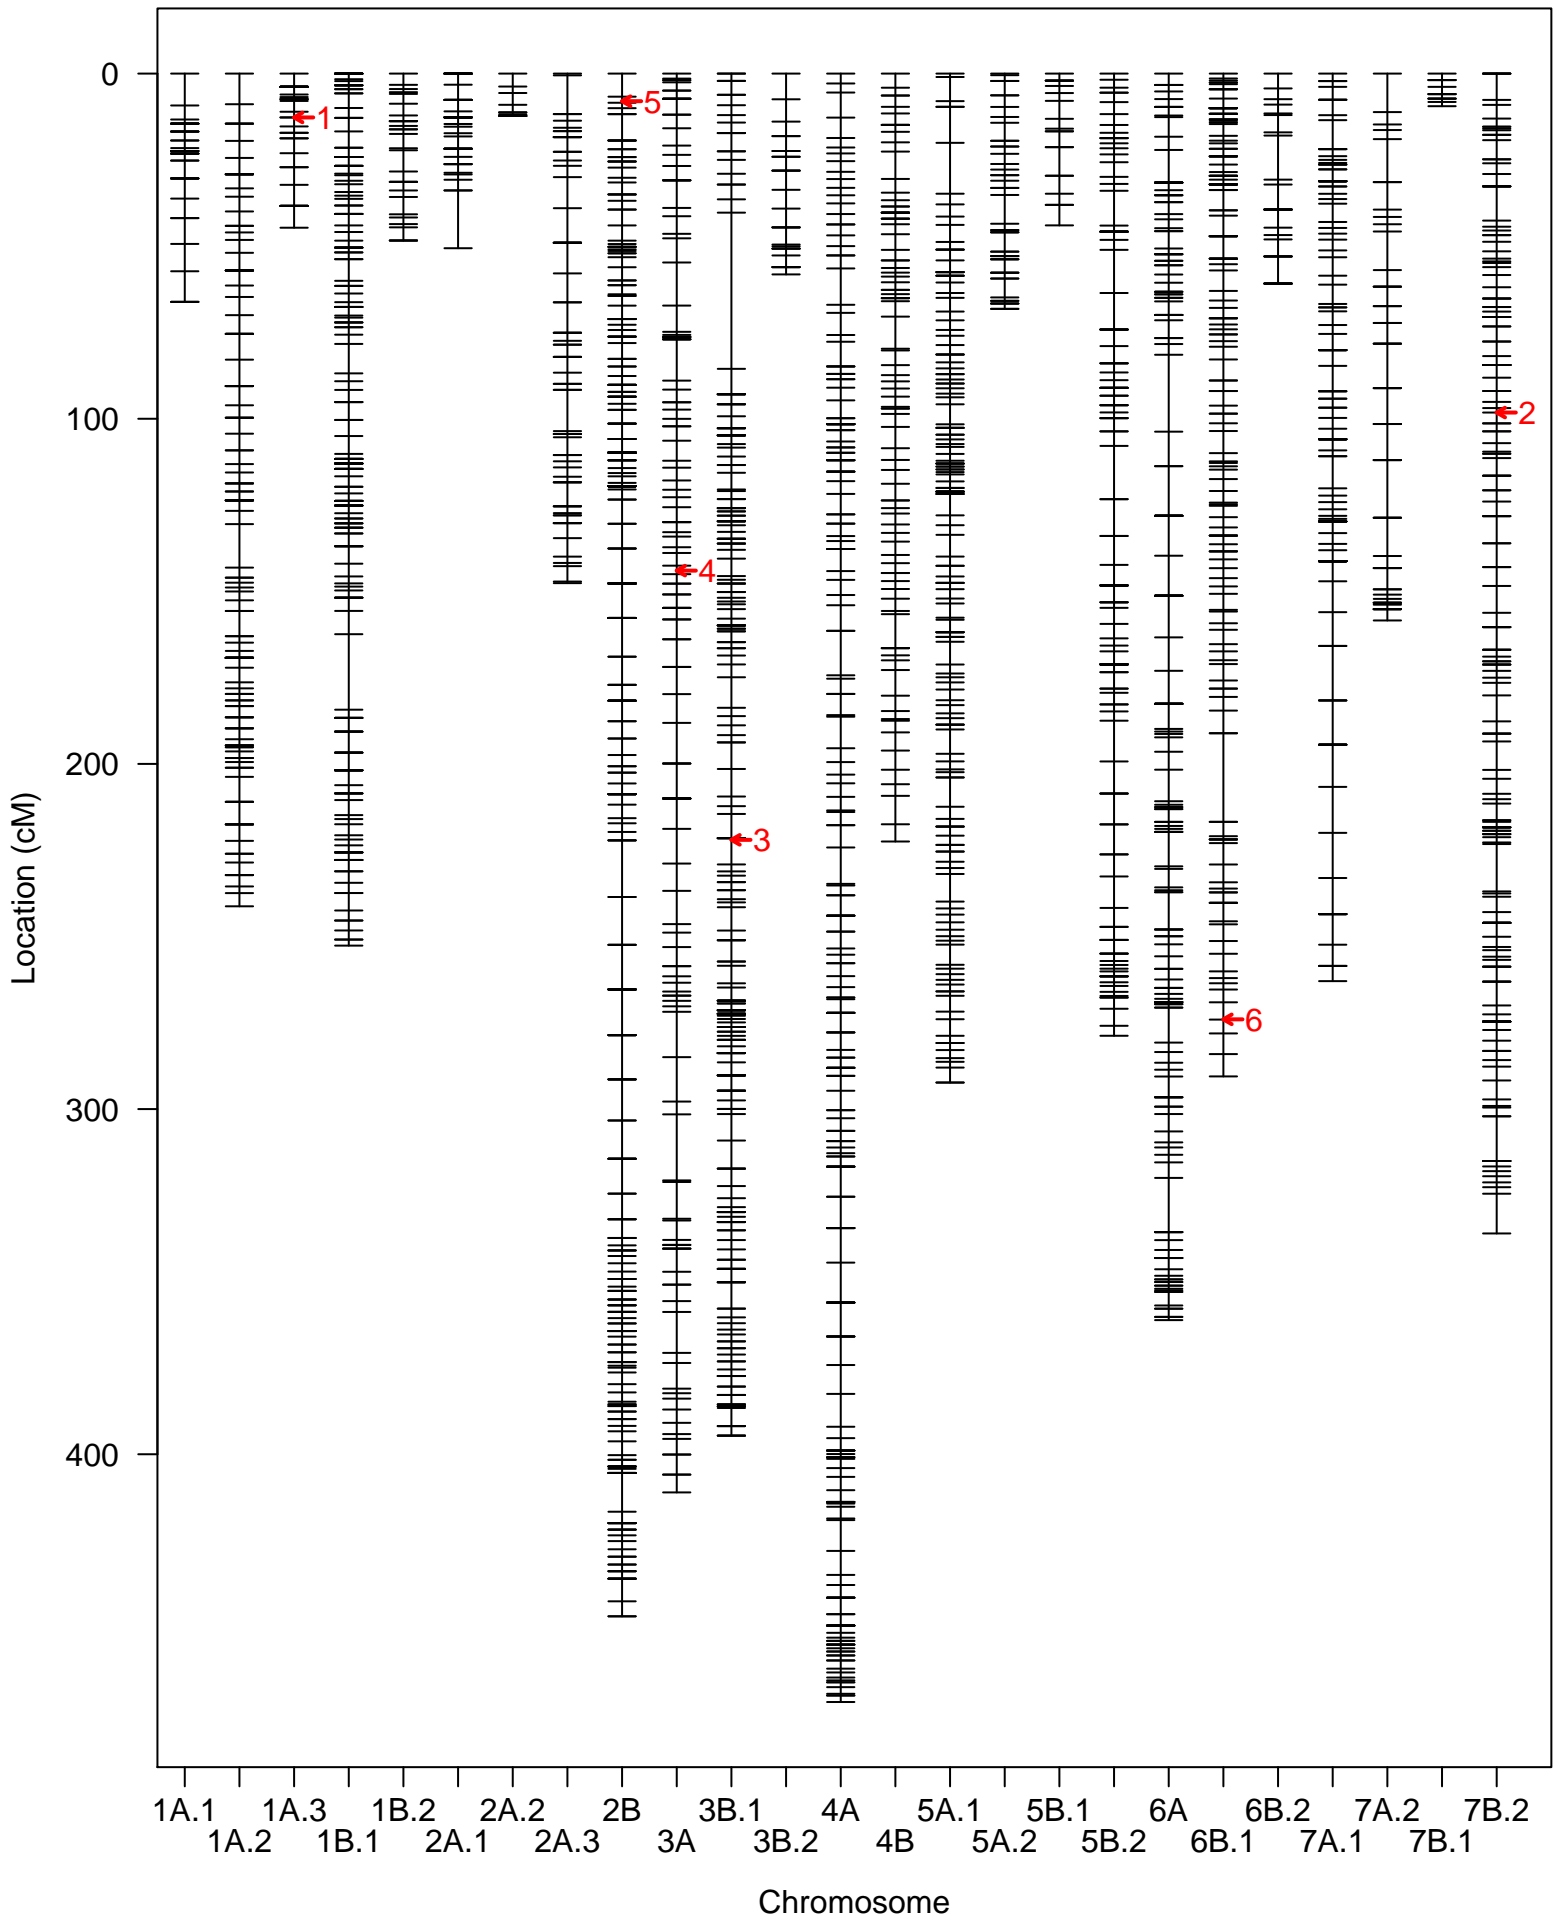

Supplement: Supplementary file 1 [file 1]
